# Supplementary material
Source: Research Square preprint supplement (doi:10.21203/rs.3.rs-8912911/v1)
Supplement: Supplementary file 1 [file e4a9f0d3bb01169fb6cc9bc3.docx]

**A SINGLE SPECIES, DIFFERENT REPEATOMES: GENOMIC PLASTICITY IN *Passiflora foetida* L.**

*Arthur Monteiro1; Mariela A. Sader2; Jéssica Nascimento3; Gustavo Luna1; Daniela Cristina Imig4; Andrea Pedrosa Harand1*

**Supplementary Materials**

**Supplementary Table 1.** Accessions of *Passiflora foetida* used for FISH

| **Accessions** | **Vouchers** | **Variety** | **Longitude** | **Latitude** | **Municipality** | **Source** |
| --- | --- | --- | --- | --- | --- | --- |
| APH0100 | UFP90688 | var. *foetida* | -47.71 | -15.60 | - | Embrapa-DF |
| APH218 | UFP100030 | var. *foetida* | -34.83 | -7.10 | João Pessoa-PB | Field |
| APH222 | UFP100031 | var. *foetida* | -38.24 | -10.38 | Ribeira do Pombal-BA | Field |
| APH219 | - | var*. foetida* | -39.08 | -12.68 | - | Embrapa-BA |

**Supplementary Table 2.** Accessions from *P. foetida* and their respective varieties used as source for short reads. Status (native or non-native), geographic coordinates, collection site, and accession codes in the ENA or GSA platforms (PF001) are also presented. *Accession also used for individual characterization

|  | Status | Longitude | Latitude | Localization | Code |
| --- | --- | --- | --- | --- | --- |
| ***Passiflora foetida*** |  |  |  |  |  |
| var. *acapulsensis* |  |  |  |  |  |
| PF071 | native | -97.2 | 18.1 | Mexico | ERR5419830 |
| PF078 | native | -86.30 | 13.16 | Nicaragua | ERR5419836 |
| PF102 | native | -95.95 | 16.54 | Mexico | ERR5419852 |
| var. *baraquiniana* |  |  |  |  |  |
| PF008 | native | -65.36 | -26.46 | Argentina | ERR5419787 |
| PF018* | native | -37.16 | -8.61 | Brazil | ERX5203483 |
| PF023 | native | -40.13 | -10.67 | Brazil | ERR5419797 |
| var. *ellisonii* |  |  |  |  |  |
| PF001 | - | 114.30 | 22.36 | China | CRR889390 |
| PF064 | non native | 50.05 | -14.10 | Madagascar | ERR5419825 |
| PF153 | non native | 141.76 | -17.17 | Australia | ERR5419888 |
| var. *foetida* |  |  |  |  |  |
| PF031 | native | -71.56 | 18.39 | Dominican Republic | ERR5419803 |
| PF057 | native | -78.66 | -4.35 | Ecuador | ERR5419819 |
| PF107 | native | -34.83 | -7.09 | Brazil | ERR5419909 |
| var. *nigelliflora* |  |  |  |  |  |
| PF007 | native | -55.56 | -27.43 | Argentina | ERR5419786 |
| PF020 | native | -60.46 | 2.94 | Brazil | ERR5419795 |
| PF085 | nativa | -59.84 | -20.55 | Paraguai | ERR5419841 |

**Supplementary Table 3.** Species used for comparative analyses among species of the subgenus *Passiflora*, as well as for comparisons within the section *Dysosmia*. Genome size data follow Melo & Guerra (2021), Yokoto (2011), and Zirpoli et al., (2025). Only *P. ciliata* does not yet have genome size information available

|  | Genome size (1C) | Reference | Code ENA |
| --- | --- | --- | --- |
| **Subg. Passiflora** |  |  |  |
| *P. caerulea* | 1355,5 Mpb | Yokoto, 2011 | ERR5419862 |
| *P. ciliata* | - | - | ERX5203540 |
| *P. cincinnata* | 1338,7 Mpb | Yokoto, 2011 | SRX9515500 |
| *P. coccinea* | 1307,8 Mpb | Yokoto, 2011 | ERR5419865 |
| *P. edulis* | 1230,3 Mpb | Yokoto, 2011 | ERR5419919 |
| ***P. foetida*** | 440,1 Mpb | Yokoto, 2011 | ERX5203483 |
| *P. incarnata* | 644,5 Mpb | Yokoto, 2011 | ERR5419921 |
| *P. liguralis* | 1382,8 Mpb | Yokoto, 2011 | ERR5419923 |
| *P. quadrangularis* | 2621,0 Mpb | Yokoto, 2011 | ERR5419924 |
| *P. versicaria* | 567,2 Mpb | Zirpoli et al., 2025 | ERX5203495 |
| **Subg. Decaloba** |  |  |  |
| *P. organensis* | 207,3 Mpb | Yokoto, 2011 | - |
| *P. suberosa* | 668,9 Mpb | Yokoto, 2011 | ERX5203559 |

|  |  | *P. cearulea* | *P. coccinea* | *P. cincinnata* | *P. quadrangularis* | *P. edulis* | *P. liguralis* | *P. incarnata* | ***P. foetida*** | *P. organensis* | *P. suberosa* |  |  |  |
| --- | --- | --- | --- | --- | --- | --- | --- | --- | --- | --- | --- | --- | --- | --- |
| *2n* |  | 18 | 18 | 18 | 18 | 18 | 18 | 18 | 20 | 12 | 24 |  |  |  |
| Genome size |  | 1355,5 Mpb | 1307,8 Mpb | 1338,7 Mpb | 2621,0 Mpb | 1230,3 Mpb | 1382,8 Mpb | 644,5 Mpb | 440,1 Mpb | 207,3 Mpb | 668,9 Mpb |  |  |  |
| Reads in the comparative analysis |  | 466,296 | 450,010 | 477,950 | 902,074 | 423,924 | 476,722 | 221,998 | 151,300 | 71,520 | 230,588 |  |  |  |
| Coverage |  | 0.05x | 0.05x | 0.05x | 0.05x | 0.05x | 0.05x | 0.05x | 0.05x | 0.05x | 0.05x |  |  |  |
| **TEs Classe I** |  |  |  |  |  |  |  |  |  |  |  | **Mean** | **SD** | **CV** |
| Ty3/gypsy |  | 42,94% | 31,82% | 27,95% | 46,09% | 46,36% | 47,81% | 27,28% | 4,38% | 11,96% | 31,51% | 31.81% | 0.1482 | 0.4660 |
| Chromovirus | CRM | 0,18% | 0,02% | 0,36% | 0,32% | 0,11% | 0,11% | 0,33% | 0,24% |  |  | 0.21% | 0.0012 | 0.5920 |
|  | Tekay | 30,01% | 22,18% | 17,83% | 38,88% | 33,49% | 42,08% | 20,91% | 2,26% | 11,96% | 15,87% | 23.55% | 0.1250 | 0.5310 |
| Non-chromovirus | Athila | 12,75% | 9,62% | 9,76% | 6,89% | 12,76% | 5,62% | 6,04% | 1,88% |  | 15,64% | 9.00% | 0.0431 | 0.4791 |
| Ty1/copia |  | 17,76% | 35,95% | 35,71% | 27,42% | 18,33% | 18,11% | 18,89% | 23,55% | 0,87% | 6,63% | 20.32% | 0.1118 | 0.5502 |
|  | Ale | 0,04% | 0,03% | 0,11% | 0,07% | 0,04% | 0,04% | 0,03% |  |  |  | 0.05% | 0.0003 | 0.5661 |
|  | Angela | 11,57% | 29,85% | 28,64% | 26,73% | 16,14% | 17,39% | 15,12% | 19,97% | 0,01% |  | 18.38% | 0.0942 | 0.5124 |
|  | Bianca | 0,21% | 0,21% | 0,17% | 0,09% | 0,15% | 0,13% | 0,22% | 0,47% | 0,52% | 0,90% | 0.31% | 0.0025 | 0.8210 |
|  | Ikeros | 0,11% | 0,18% | 0,29% | 0,13% | 0,14% | 0,10% | 0,21% | 0,12% |  | 0,04% | 0.15% | 0.0007 | 0.4917 |
|  | Ivana | 0,01% | 0,02% | 0,02% | 0,01% | 0,01% | 0,01% | 0,03% |  |  |  | 0.02% | 0.0001 | 0.5007 |
|  | SIRE | 5,62% | 4,38% | 5,94% | 0,27% | 1,53% | 0,24% | 2,99% | 2,77% | 0,03% | 5,09% | 2.89% | 0.0230 | 0.7982 |
|  | Tork | 0,20% | 0,28% | 0,54% | 0,12% | 0,32% | 0,20% | 0,29% | 0,22% | 0,31% | 0,60% | 0.31% | 0.0015 | 0.4921 |
| Pararetrovirus |  |  | 0,01% |  | 0,05% | 0,01% | 0,01% | 0,01% | 0,01% |  |  | 0.02% | 0.0002 | 0.9798 |
| **TEs Classe II** |  |  |  |  |  |  |  |  |  |  |  |  |  |  |
|  | hAT | 0,04% | 0,02% | 0,05% | 0,02% | 0,03% | 0,03% | 0,05% | 0,06% |  | 0,01% | 0.03% | 0.0002 | 0.4839 |
|  | MuDR_Mutator | 0,01% | 0,02% | 0,03% | 0,01% | 0,02% | 0,02% | 0,02% | 0,02% |  |  | 0.02% | 0.0001 | 0.3418 |
| **SatDNA** |  | 0,04% | 0,03% |  | 0,05% | 0,06% |  | 0,01% | 3,98% | 0,97% |  | 0.73% | 0.0147 | 2.0058 |
| **rDNA** | 5S | 0,01% | 0,01% | 0,01% | 0,01% | 0,03% | 0,08% | 0,29% | 0,11% | 0,01% | 0,04% | 0.06% | 0.0009 | 1.4657 |
|  | 35S | 1,00% | 1,29% | 0,93% | 0,80% | 0,87% | 1,34% | 1,65% | 3,46% | 1,79% | 1,74% | 1.49% | 0.0078 | 0.5274 |
| LTR Unclassified |  | 4,11% | 2,90% | 1,91% | 2,33% | 3,09% | 1,61% | 3,54% | 5,86% |  | 2,89% | 3.14% | 0.0128 | 0.4083 |
| Unclassified |  | 6,18% | 2,58% | 1,89% | 1,81% | 2,25% | 1,46% | 2,44% | 8,87% | 0,82% | 0,95% | 2.93% | 0.0257 | 0.8793 |
|  | **Total** | 72,11% | 73,64% | 68,48% | 78,56% | 71,05% | 70,49% | 54,24% | 50,35% | 16,79% | 43,31% |  |  |  |

**Supplementary Table 4.** Comparative analysis of repeats from eight species of the subgenus *Passiflora* and two species of the subgenus *Decaloba* identified by RepeatExplorer2. Chromosome number (Melo & Guerra, 2021), genome size (Yokoto, 2011), number of sequences automatically sampled for the comparative clustering analysis, resulting coverage, and proportion of sequences in the major clusters corresponding to different repeats are indicated

**Supplementary Table 5.** Comparative analysis of repeats from 15 accessions from five varieties of *P. foetida*. Number of sequences (reads) automatically sampled for the clustering analysis, resulting coverage, and proportion of reads in the major clusters corresponding to different repeats are indicated

|  | |  |  | var*. acapulsensis* | | | var*. baraquiniana* | | | var*. ellisonii* | | | var*. foetida* | | | var. *nigelliflora* | | |  |  |  |
| --- | --- | --- | --- | --- | --- | --- | --- | --- | --- | --- | --- | --- | --- | --- | --- | --- | --- | --- | --- | --- | --- |
|  | |  |  | Pf071 | Pf078 | Pf102 | Pf008 | Pf018 | Pf023 | Pf001 | Pf064 | Pf153 | Pf031 | Pf057 | Pf107 | Pf007 | Pf020 | Pf085 |  |  |  |
|  | | Reads |  | 105,972 | 106,390 | 106,114 | 106,458 | 106,772 | 106,010 | 107,598 | 105,776 | 106,998 | 106,756 | 105,864 | 106,124 | 107,138 | 106,314 | 106,140 |  |  |  |
|  | | Coverage |  | 0.03x | 0.03x | 0.03x | 0.03x | 0.03x | 0.03x | 0.03x | 0.03x | 0.03x | 0.03x | 0.03x | 0.03x | 0.03x | 0.03x | 0.03x |  |  |  |
|  | | **TEs Class I** |  |  |  |  |  |  |  |  |  |  |  |  |  |  |  |  | Mean | SD | CV |
|  | | Ty3/gypsy |  | 4,59% | 4,64% | 4,60% | 1,11% | 4,51% | 0,76% | 4,06% | 5,08% | 4,20% | 5,15% | 1,82% | 4,40% | 4,41% | 4,28% | 3,82% | 3.83 | 0.014 | 0.366 |
|  | Chromovirus | | CRM | 0,41% | 0,24% | 0,45% | 0,02% | 0,17% | 0,02% | 0,14% | 0,10% | 0,14% | 0,16% | 0,07% | 0,15% | 0,09% | 0,14% | 0,03% | 0.16 | 0.001 | 0.819 |
|  | |  | Galadriel | 0,04% | 0,13% | 0,08% | 0,02% | 0,05% | 0,00% | 0,17% | 0,14% | 0,16% | 0,13% | 0,03% | 0,07% | 0,03% | 0,05% | 0,05% | 0.08 | 0.001 | 0.717 |
|  | |  | Tekay | 1,01% | 1,27% | 1,08% | 0,54% | 2,34% | 0,33% | 2,00% | 2,20% | 2,02% | 2,44% | 0,79% | 2,30% | 2,10% | 2,41% | 1,98% | 1.65 | 0.007 | 0.444 |
|  | Non-chromovirus | | Athila | 3,13% | 3,00% | 2,99% | 0,53% | 1,95% | 0,41% | 1,75% | 2,64% | 1,88% | 2,42% | 0,93% | 1,88% | 2,19% | 1,68% | 1,76% | 1.94 | 0.008 | 0.433 |
|  | | Ty1/copia |  | 21,58% | 19,66% | 21,75% | 8,22% | 29,94% | 4,98% | 36,24% | 45,83% | 36,57% | 40,40% | 19,14% | 29,55% | 36,93% | 27,44% | 26,10% | 26.96 | 0.115 | 0.425 |
|  | |  | Angela | 20,34% | 18,73% | 20,50% | 5,63% | 23,60% | 4,36% | 27,29% | 38,00% | 27,25% | 30,28% | 14,17% | 23,12% | 25,47% | 19,69% | 16,13% | 20.97 | 0.088 | 0.418 |
|  | |  | Bianca | 0,42% | 0,19% | 0,41% | 0,07% | 0,46% | 0,03% | 0,33% | 0,20% | 0,37% | 0,48% | 0,14% | 0,46% | 0,37% | 0,41% | 0,29% | 0.31 | 0.001 | 0.478 |
|  | |  | Ikeros | 0,08% | 0,05% | 0,06% | 0,01% | 0,12% |  | 0,09% | 0,06% | 0,08% | 0,11% | 0,03% | 0,10% | 0,09% | 0,09% | 0,07% | 0.07 | 0.000 | 0.408 |
|  | |  | SIRE | 0,56% | 0,53% | 0,59% | 2,47% | 5,51% | 0,57% | 8,29% | 7,35% | 8,62% | 9,28% | 4,70% | 5,66% | 10,79% | 7,11% | 9,46% | 5.43 | 0.037 | 0.676 |
|  | |  | TAR | 0,02% | 0,02% | 0,03% |  | 0,01% |  | 0,01% | 0,01% | 0,01% | 0,01% |  | 0,01% | 0,02% | 0,01% |  | 0.01 | 0.000 | 0.473 |
|  | |  | Tork | 0,16% | 0,14% | 0,16% | 0,04% | 0,24% | 0,02% | 0,23% | 0,21% | 0,24% | 0,24% | 0,10% | 0,20% | 0,19% | 0,13% | 0,15% | 0.16 | 0.001 | 0.426 |
|  | | LINEs |  |  |  |  |  |  | 0,23% |  |  |  |  | 0,44% | 0,01% |  | 0,01% |  | 0.17 | 0.002 | 1.196 |
|  | | **TEs Class II** |  |  |  |  |  |  |  |  |  |  |  |  |  |  |  |  |  |  |  |
|  | |  | hAT | 0,07% | 0,07% | 0,07% | 0,01% | 0,10% | 0,00% | 0,08% | 0,07% | 0,08% | 0,13% | 0,03% | 0,08% | 0,07% | 0,05% | 0,03% | 0.06 | 0.000 | 0.541 |
|  | |  | MuDR_ Mutator | 0,05% | 0,04% | 0,07% | 0,02% | 0,10% | 0,01% | 0,12% | 0,10% | 0,12% | 0,15% | 0,06% | 0,08% | 0,09% | 0,06% | 0,07% | 0.08 | 0.000 | 0.507 |
|  | | **SatDNA** |  | 4,96% | 6,64% | 5,45% | 10,65% | 4,60% | 8,17% | 3,86% | 4,68% | 3,89% | 3,17% | 2,39% | 5,68% | 6,47% | 5,91% | 5,13% | 5.44 | 0.020 | 0.375 |
|  | | **rDNA** | 5S | 0,63% | 0,66% | 0,67% | 0,03% | 0,07% | 0,03% | 0,07% | 0,07% | 0,05% | 0,04% | 0,03% | 0,07% | 0,05% | 0,14% | 0,04% | 0.18 | 0.002 | 1.406 |
|  | |  | 35S | 3,18% | 4,85% | 4,88% | 3,47% | 3,29% | 8,48% | 4,98% | 5,63% | 5,69% | 2,37% | 1,47% | 3,56% | 1,27% | 2,31% | 1,84% | 3.82 | 0.019 | 0.511 |
|  | | LTR Unclassified |  | 3,82% | 3,38% | 3,76% | 1,77% | 6,49% | 2,78% | 3,60% | 3,23% | 3,41% | 4,43% | 1,66% | 7,41% | 5,92% | 6,58% | 5,35% | 4.24 | 0.017 | 0.413 |
|  | | Unclassified |  | 0,51% | 0,58% | 0,47% | 0,18% | 0,56% | 0,44% | 0,48% | 0,32% | 0,45% | 0,43% | 1,25% | 0,46% | 0,32% | 0,52% | 0,34% | 0.49 | 0.002 | 0.484 |
|  | |  | **Total** | 38,38% | 39,02% | 41,34% | 24,58% | 49,42% | 24,88% | 52,83% | 64,10% | 54,06% | 55,99% | 27,65% | 50,90% | 55,10% | 46,75% | 43,80% |  |  |  |

**Supplementary Table 6.** Proportion of the genome (%) composed of different repetitive sequences identified in the comparative RepeatExplorer2 analysis of three species from the *Dysosmia* section of the subgenus *Passiflora*

|  | ***P. ciliata*** | ***P. foetida*** | ***P. vesicaria*** |
| --- | --- | --- | --- |
| 2*n* | - | 20 | 20 |
| Genome size (1C) | - | 440,1 Mbp | 567,2 Mpb |
| Comparative clustering reads | 439,052 | 437,036 | 438,968 |
| Coverage | - | 0.1x | 0.1x |
| ***Repeat*** |  |  |  |
| **Class I** |  |  |  |
| LTR Ty3/gypsy | 0.77% | 2.67% | 2.36% |
| Chromovirus |  |  |  |
| CRM | 0.03% | 0.20% | 0.17% |
| Galadriel |  | 0.01% | 0.02% |
| Tekay | 0.74% | 2.46% | 2.17% |
| Non-chromovirus |  |  |  |
| Athila | 0.94% | 2.09% | 2.61% |
| LTR Ty1/copia | 21.30% | 30.78% | 42.15% |
| Angela | 17.41% | 22.41% | 28.66% |
| Bianca | 0.05% | 0.52% | 0.42% |
| Ikeros | 0.02% | 0.13% | 0.11% |
| SIRE | 2.85% | 5.42% | 10.17% |
| TAR |  | 0.04% | 0.04% |
| Tork | 0.03% | 0.17% | 0.14% |
| **Unclassified LTRs** | 1.10% | 6.33% | 3.94% |
| LINEs | 0.65% |  |  |
| **Class II** |  |  |  |
| MuDR_Mutator | 0.01% | 0.06% | 0.05% |
| hAT | 0.01% | 0.06% | 0.05% |
| **SatDNA** | 4.22% | 1.79% | 1.43% |
| **rDNA** |  |  |  |
| 5S | 0.05% | 0.09% | 0.04% |
| 35S | 2.45% | 5.95% | 2.03% |
| Unclassified | 17.69% | 3.58% | 2.31% |
| **Total** | 51.30% | 48.14% | 54.06% |


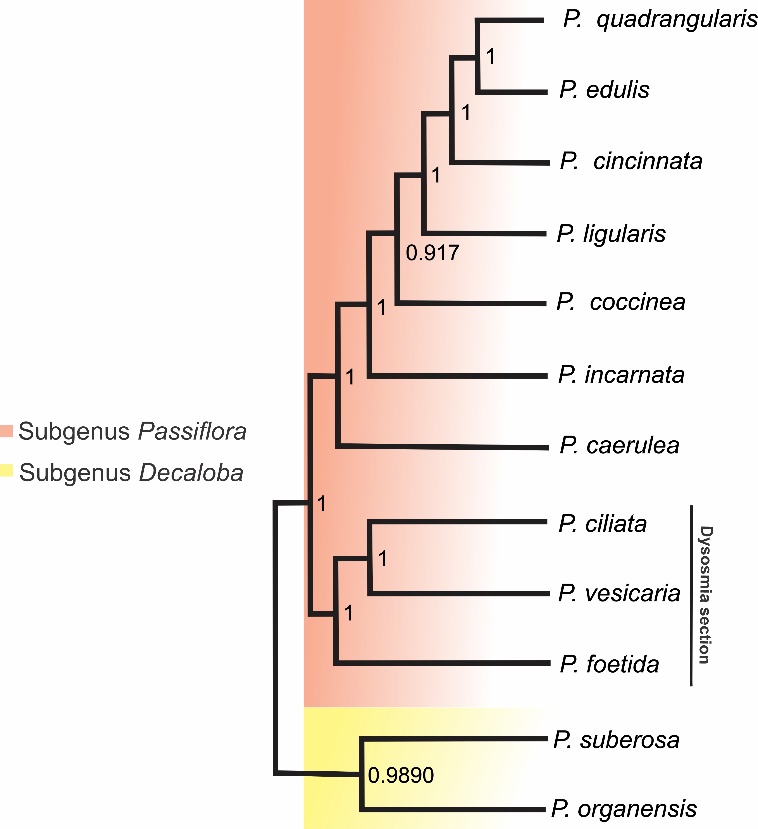


**Supplementary Figure 1.** Plastome phylogeny of the subgenus *Passiflora*, with the subgenus *Decaloba* used as the outgroup. The bar highlights the section *Dysosmia*, which is also included within the subgenus *Passiflora*.


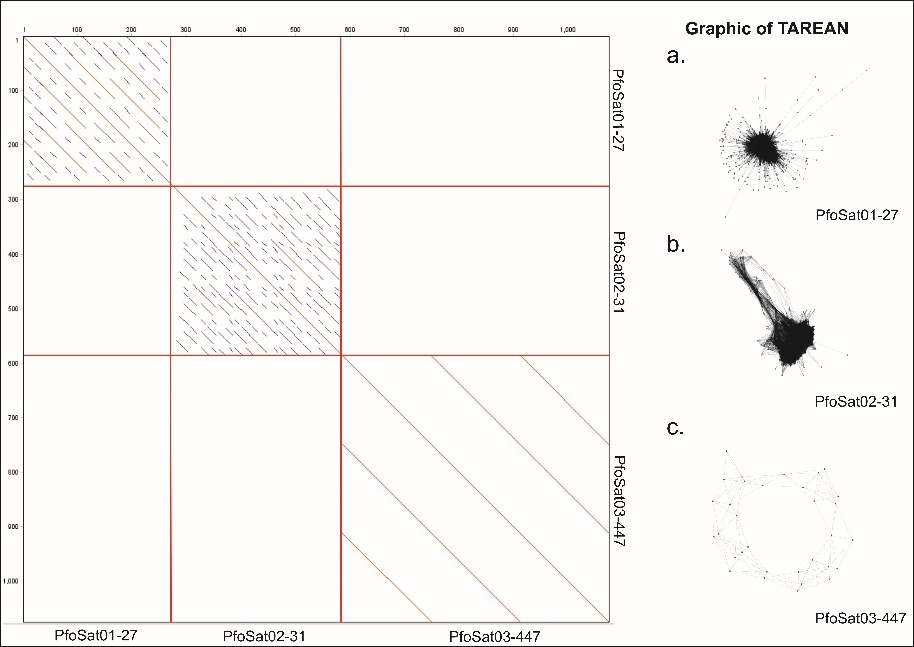


**Supplementary Figure 2.** Organization of *P. foetida* specific satellite DNAs. Left, dot plot of contigs showing tandem organization; and, right, corresponding graphs generated by TAREAN for: A. PfoSat01-27; B. PfoSat02-31; and C. PfoSat03-447.

**
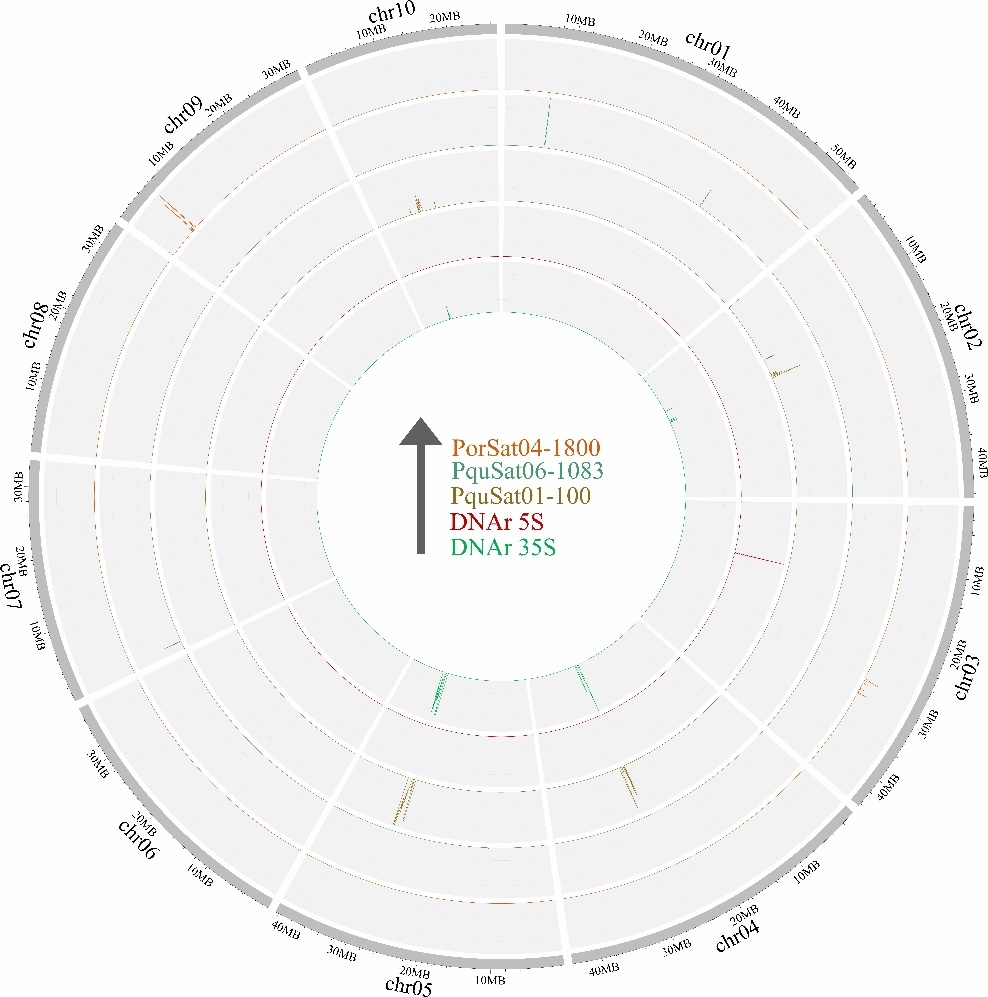
**

**Supplementary Figure 3.** Distribution of 5S and 35S rDNA sequences and shared satellites between species (PquSat01-100; PquSat06-1083; PorSat04-1800) in *P. foetida* pseudochromosomes. The arrow in the centre indicates the order of the sequences, from the centre to the periphery, with 5S rDNA (red), 35S rDNA (green).


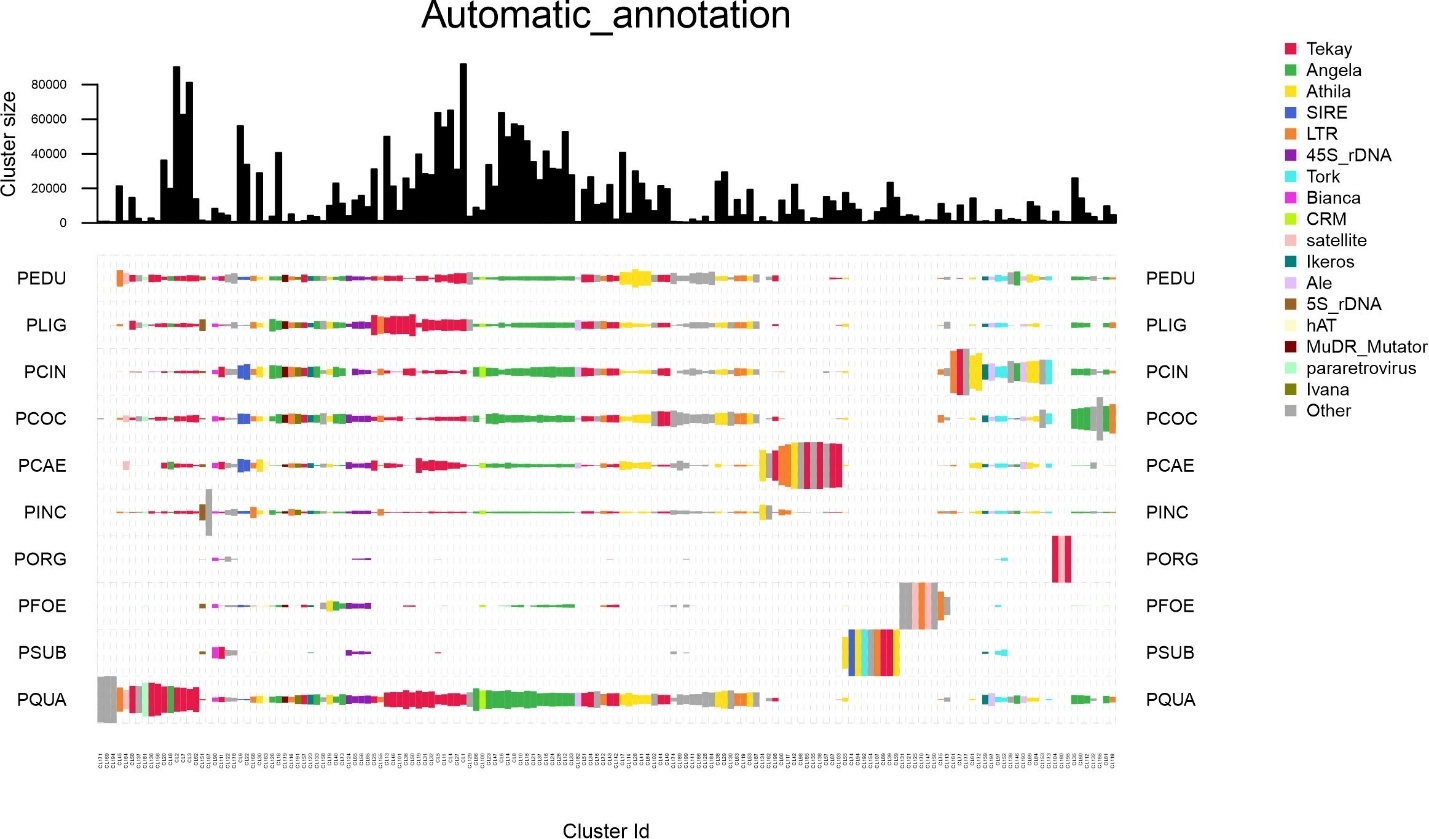


**Supplementary Figure 4.** Abundances of the clusters identified based on the comparative analysis performed with the RepeatExplorer2 pipeline, between species.


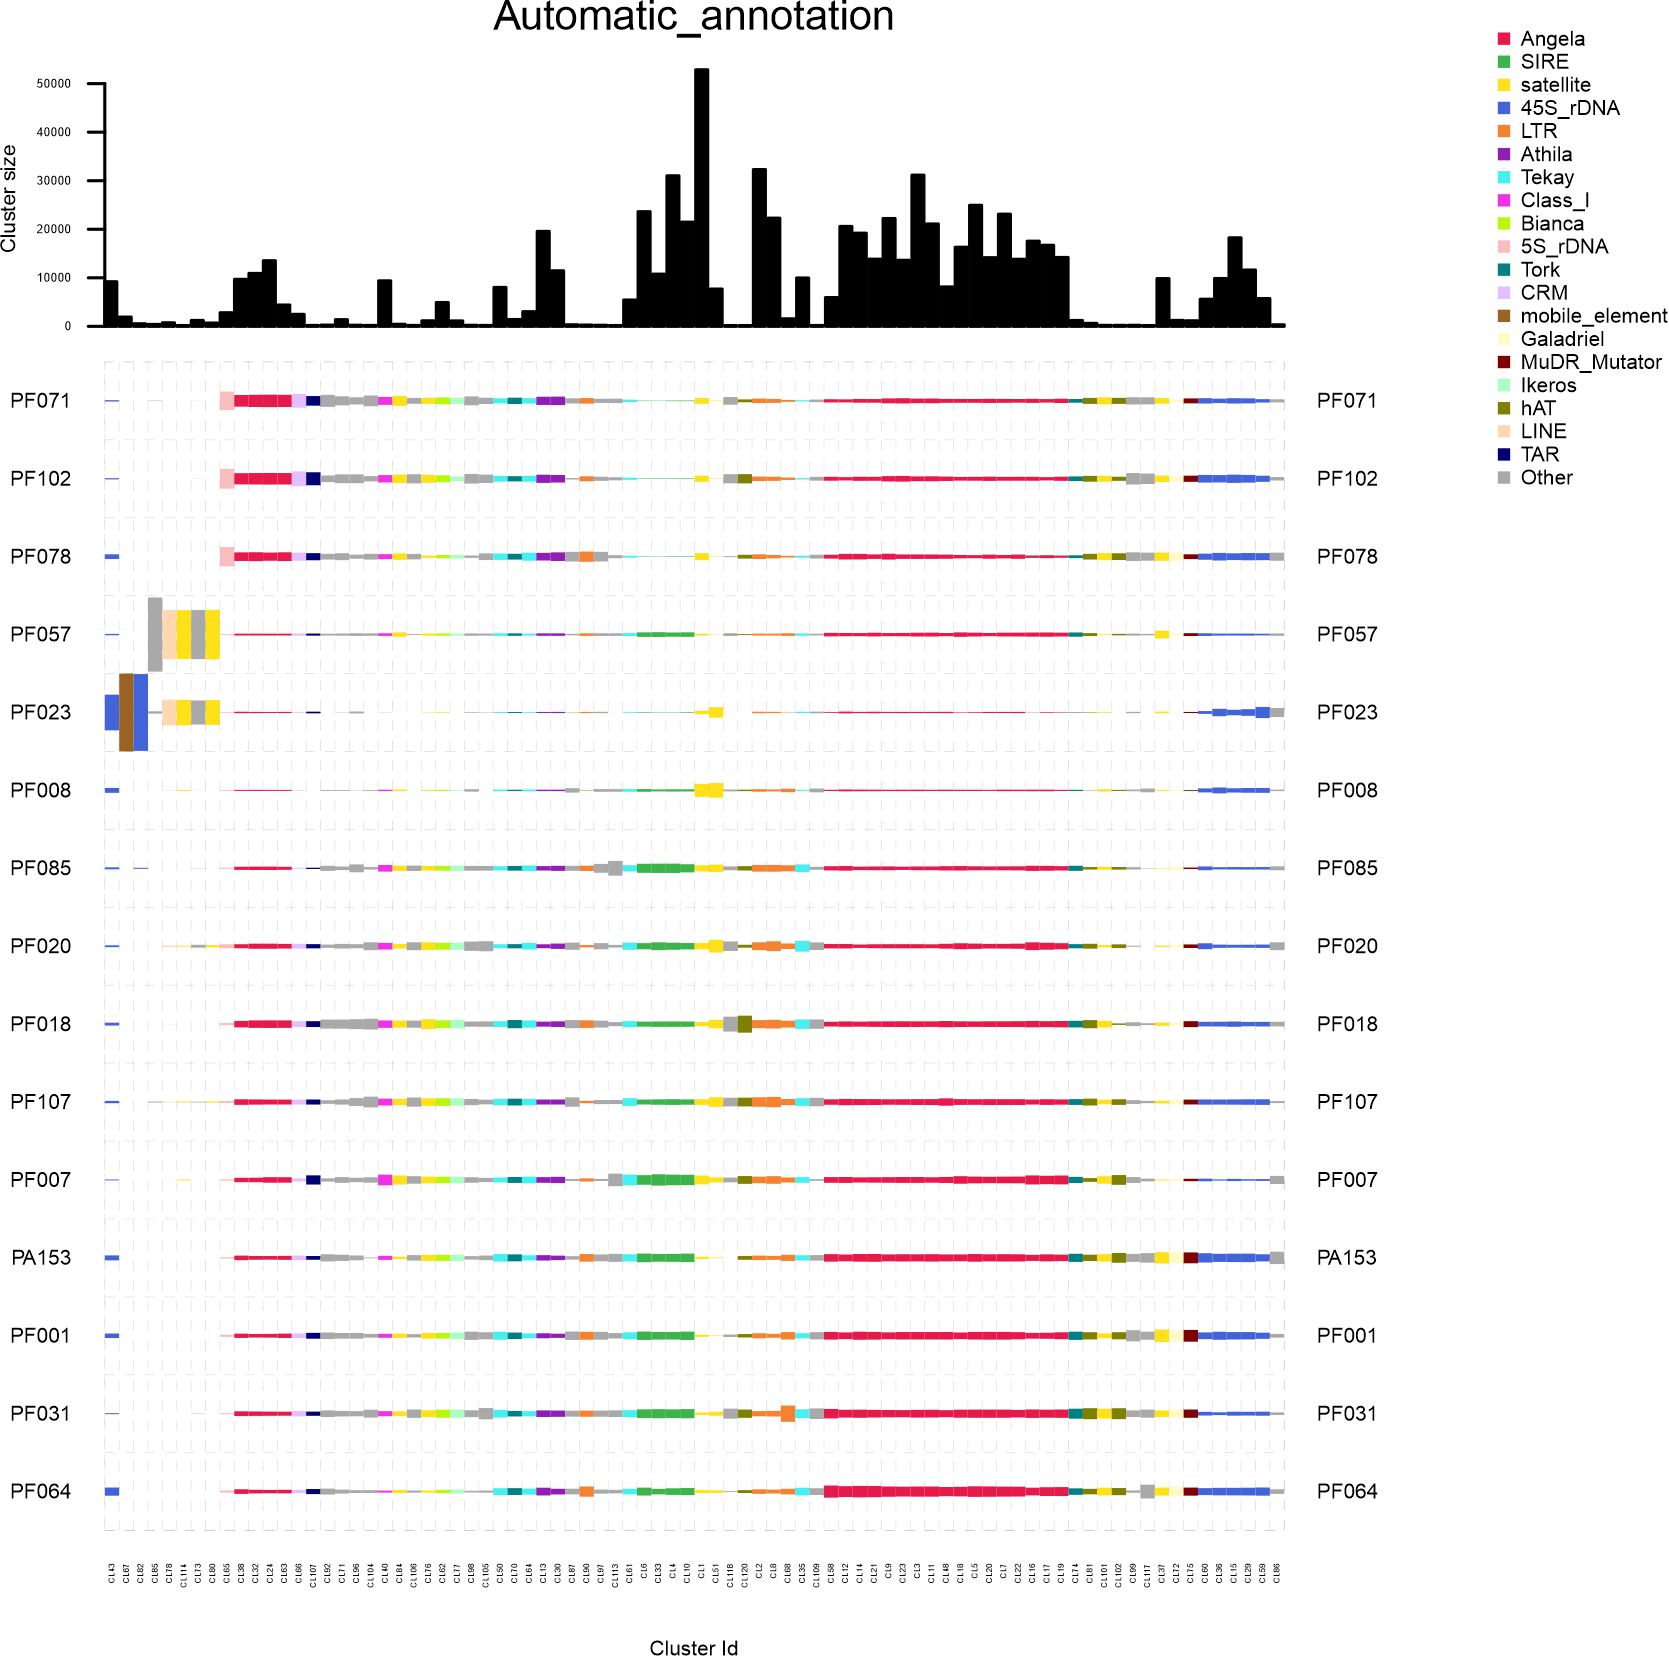


**Supplementary Figure 5.** Abundances of the clusters identified based on the comparative analysis performed with the RepeatExplorer2 pipeline, between individuals of the same species.

**
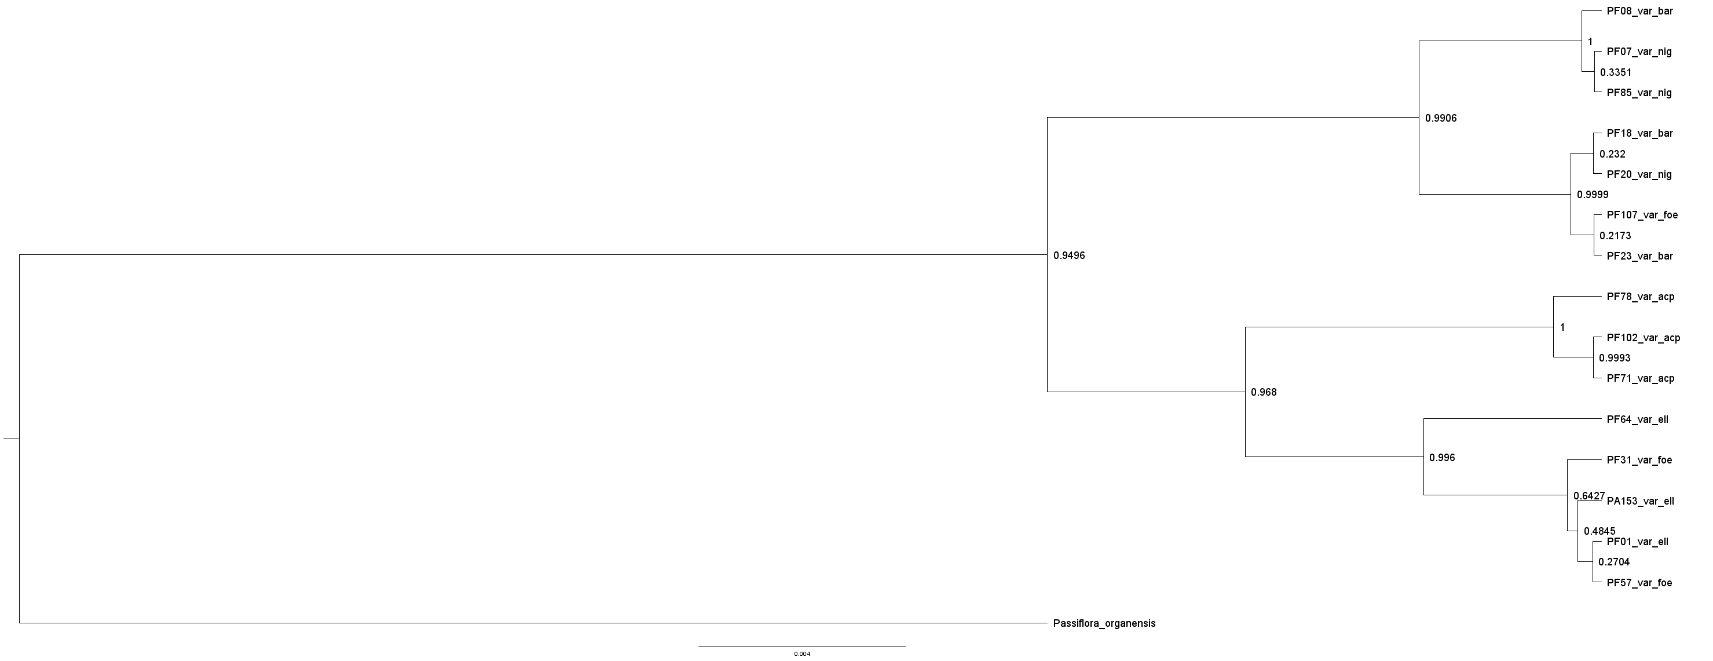
**

**Supplementary Figure 6.** Phylogenetic relationships inferred from nuclear assemblies (35S rDNA cistron) of *Passiflora foetida* accessions.


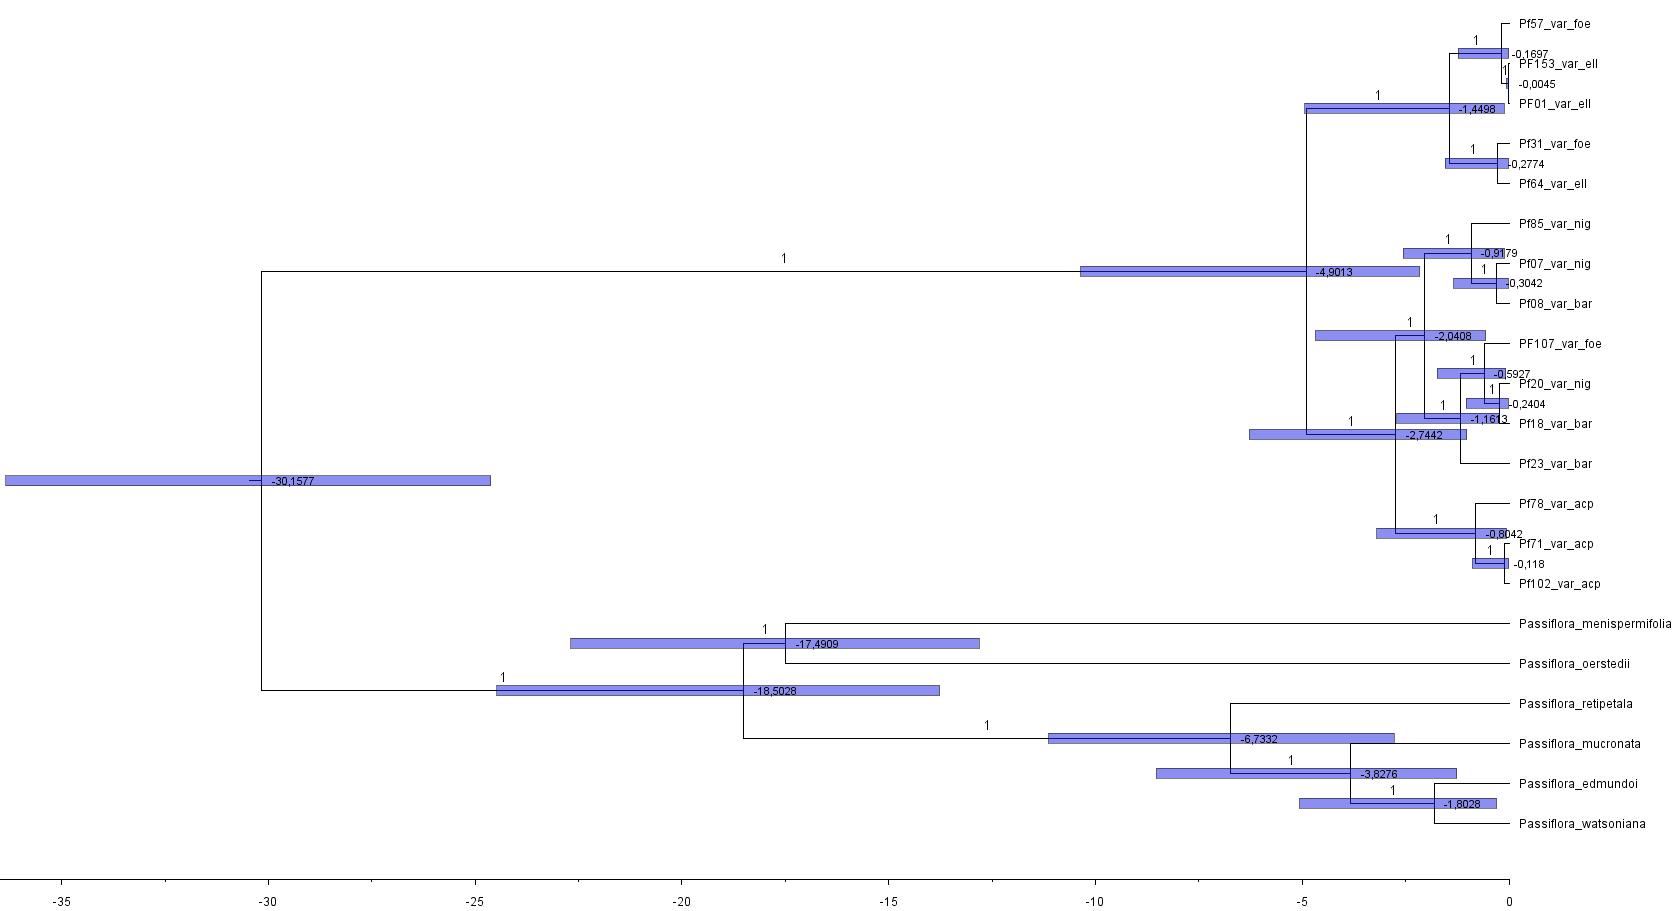


**Supplementary Figure 7.** Phylogenetic relationships inferred from plastome assemblies using *P. foetida* as a reference, with divergence time estimates based on fossil records of *Passiflora.*

*
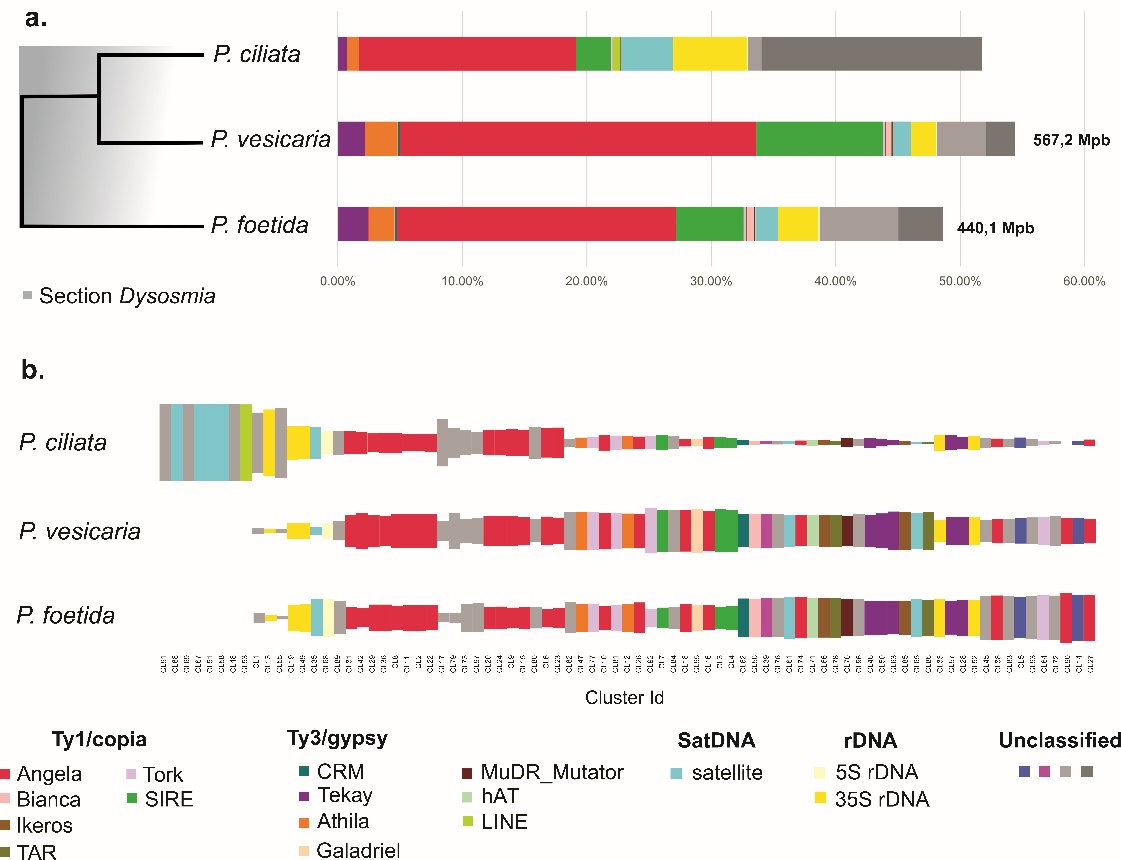
*

**Supplementary Figure 8.** Comparative abundance of repetitive DNA in different species of the section *Dysosmia*. **a.** Phylogenetic relationships inferred from plastome assemblies using *P. foetida* as a reference and abundances per repeat class and lineage; **b.** Abundances per cluster. Annotations indicated by colours**.**


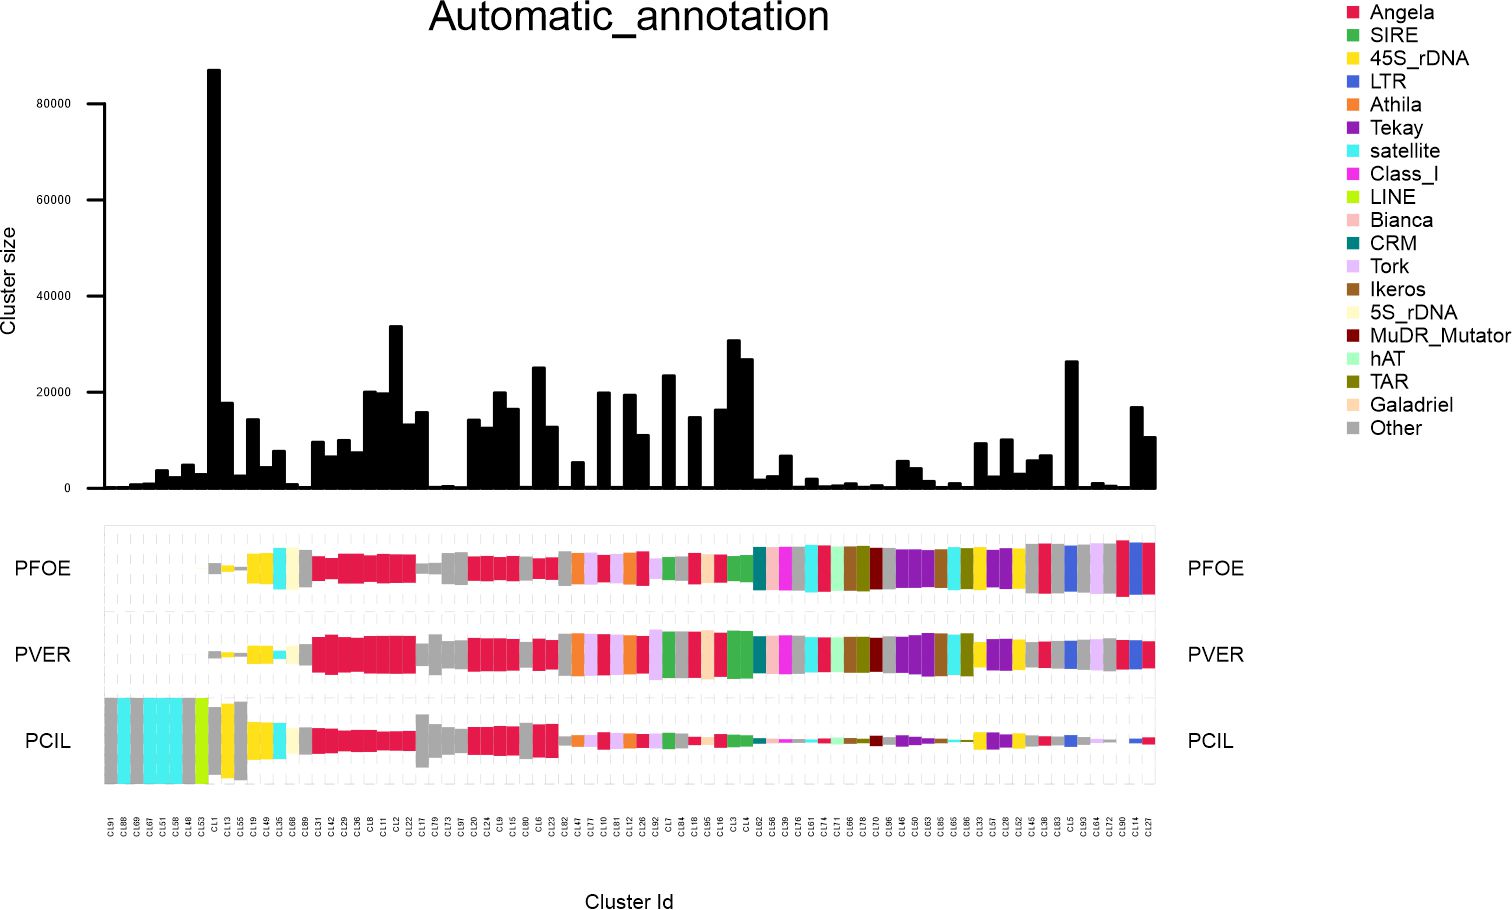


**Supplementary Figure 9.** Abundances of the clusters identified based on the comparative analysis performed with the RepeatExplorer2 pipeline, between species of *Dysosmia* section.
